# Supplementary material
Source: MDPI journal article supplement (https://www.mdpi.com/2073-445X/11/9/1436)
Supplement: s1 [file s1]

## Supplementary Material

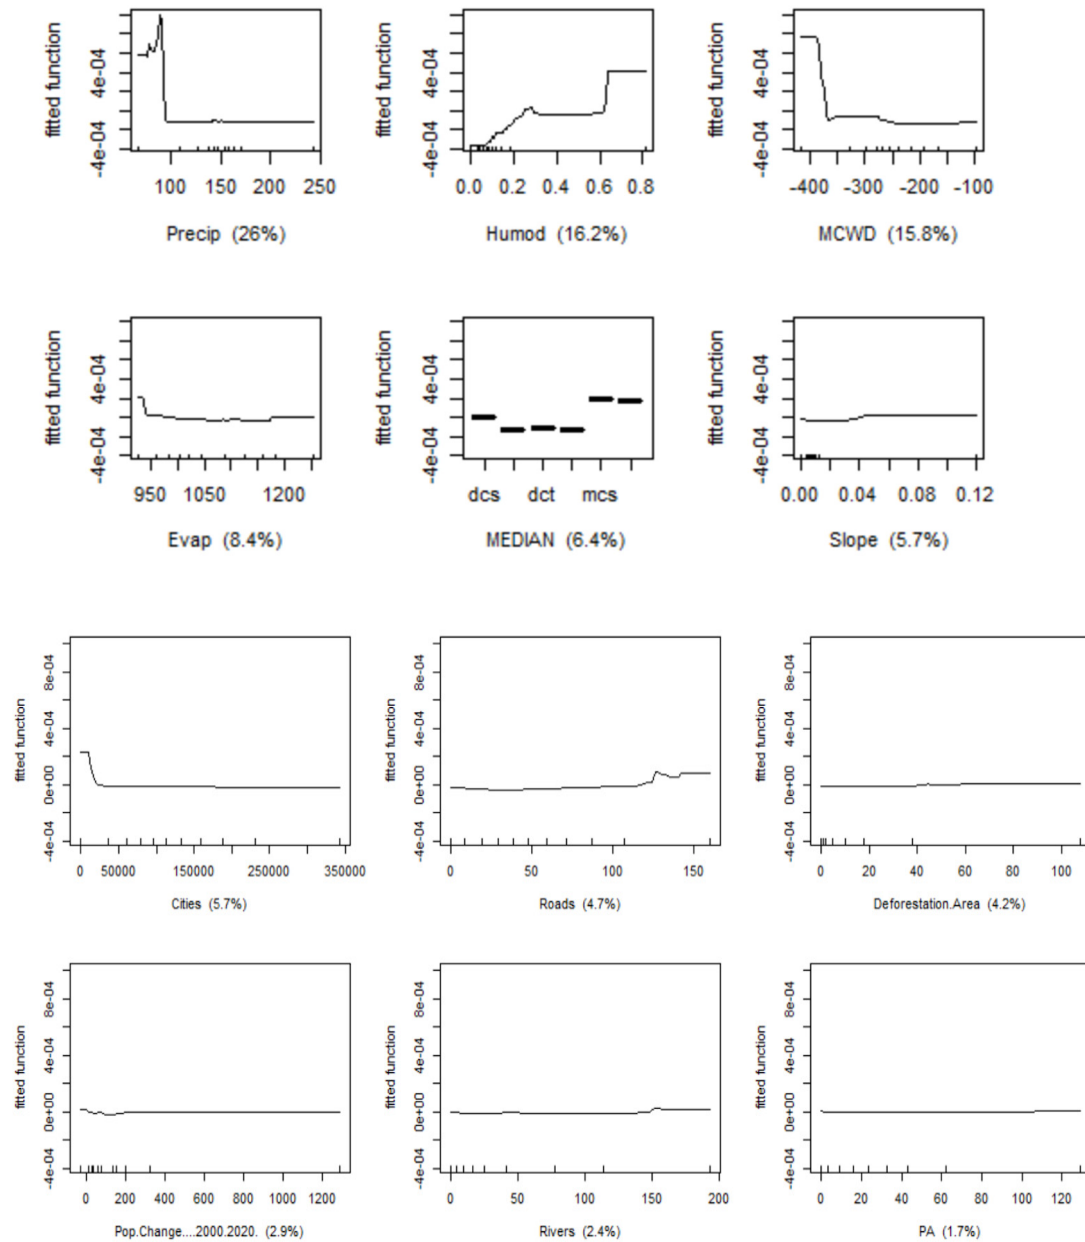

Figure S1: fitted functions for active fire density for the Bolivian Amazon

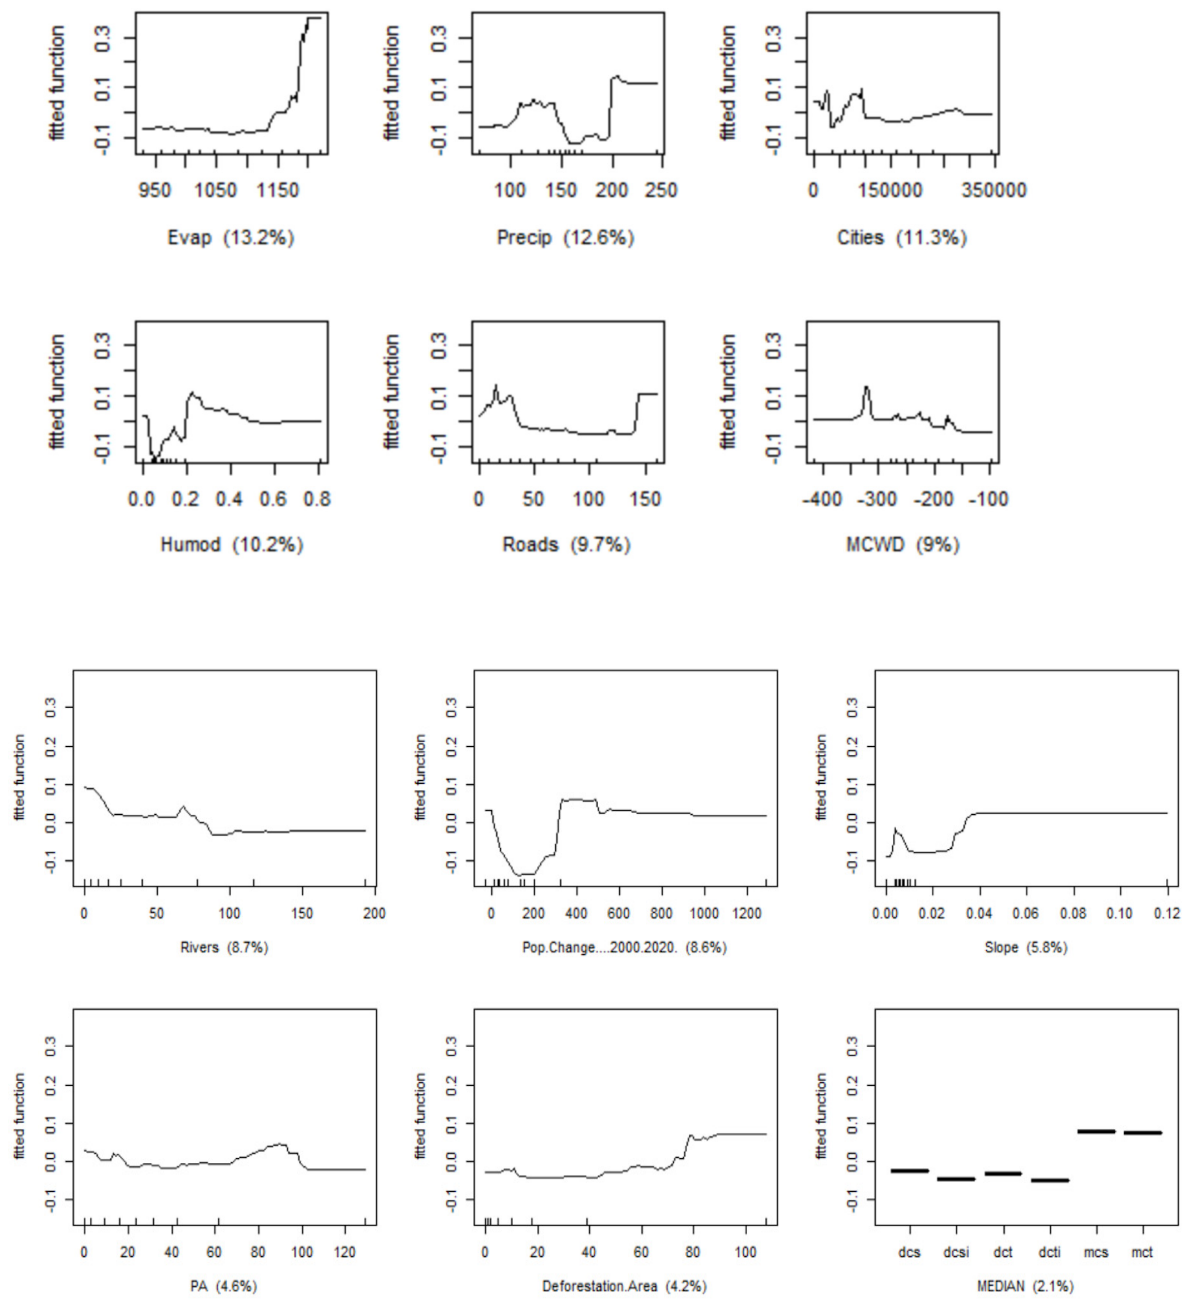

Figure S2: fitted functions for fire season length for the Bolivian Amazon

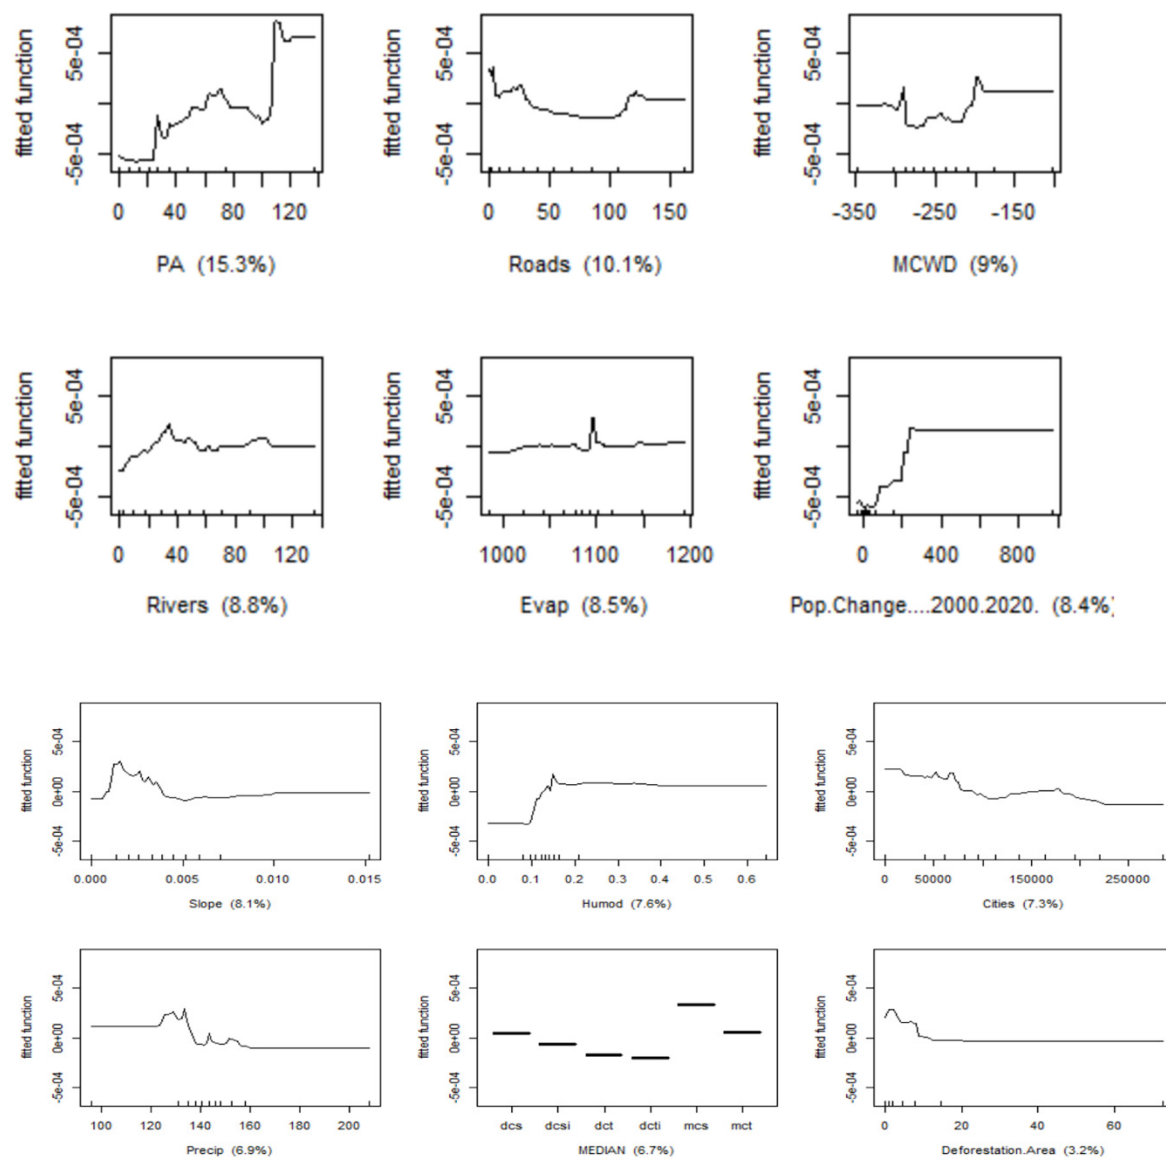

Figure S3: fitted functions for active fire density for the Beni Savanna

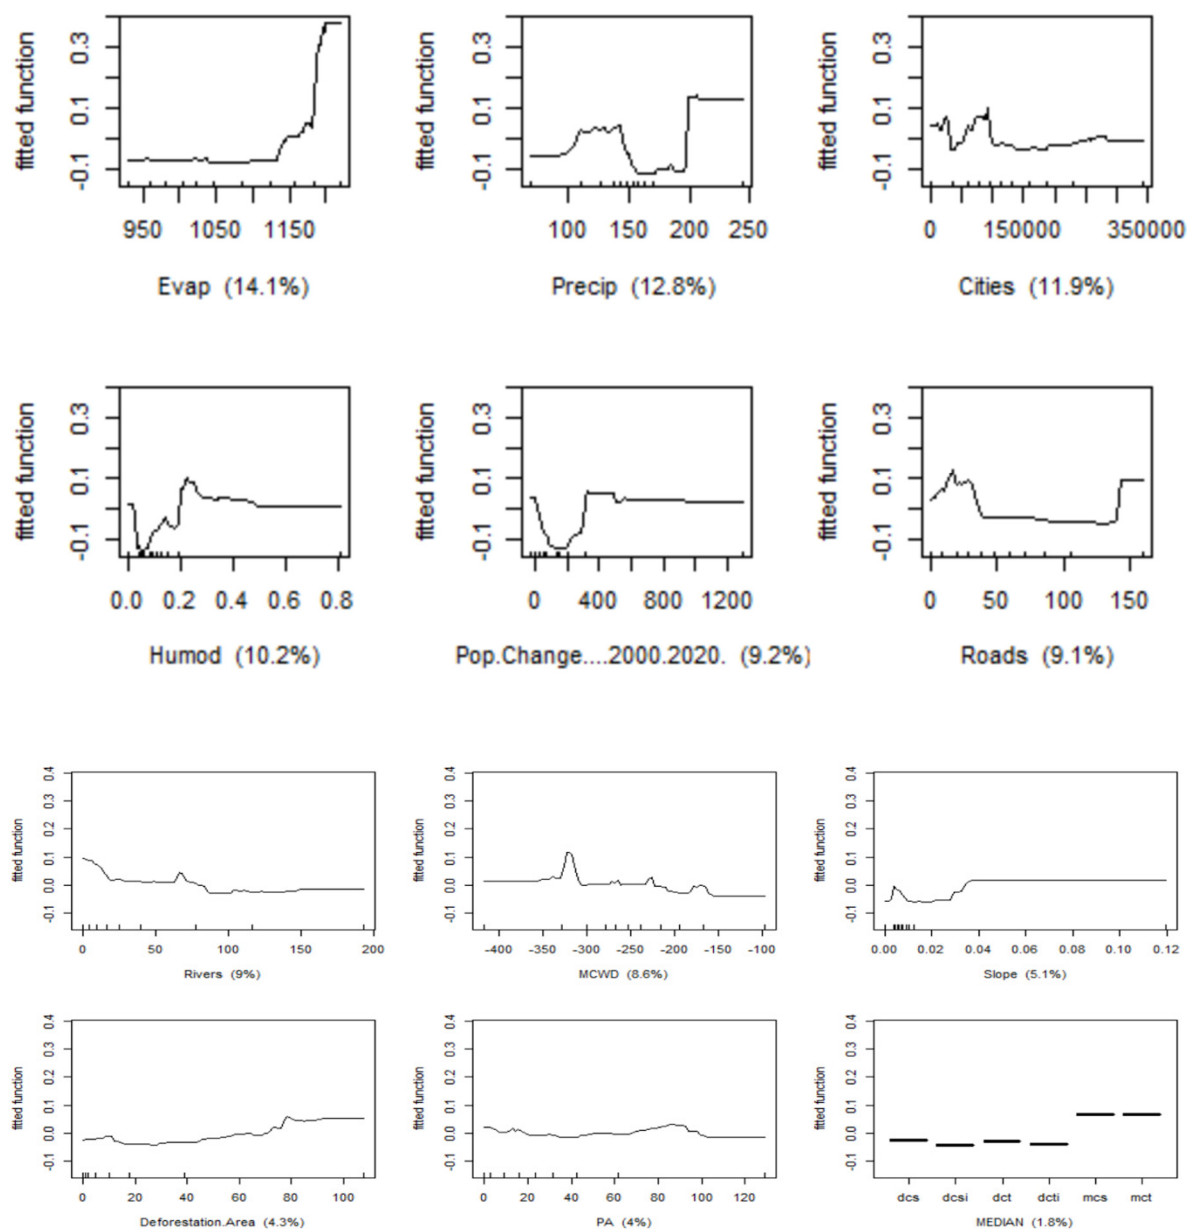

Figure S4: fitted functions for fire season length for the Beni Savanna

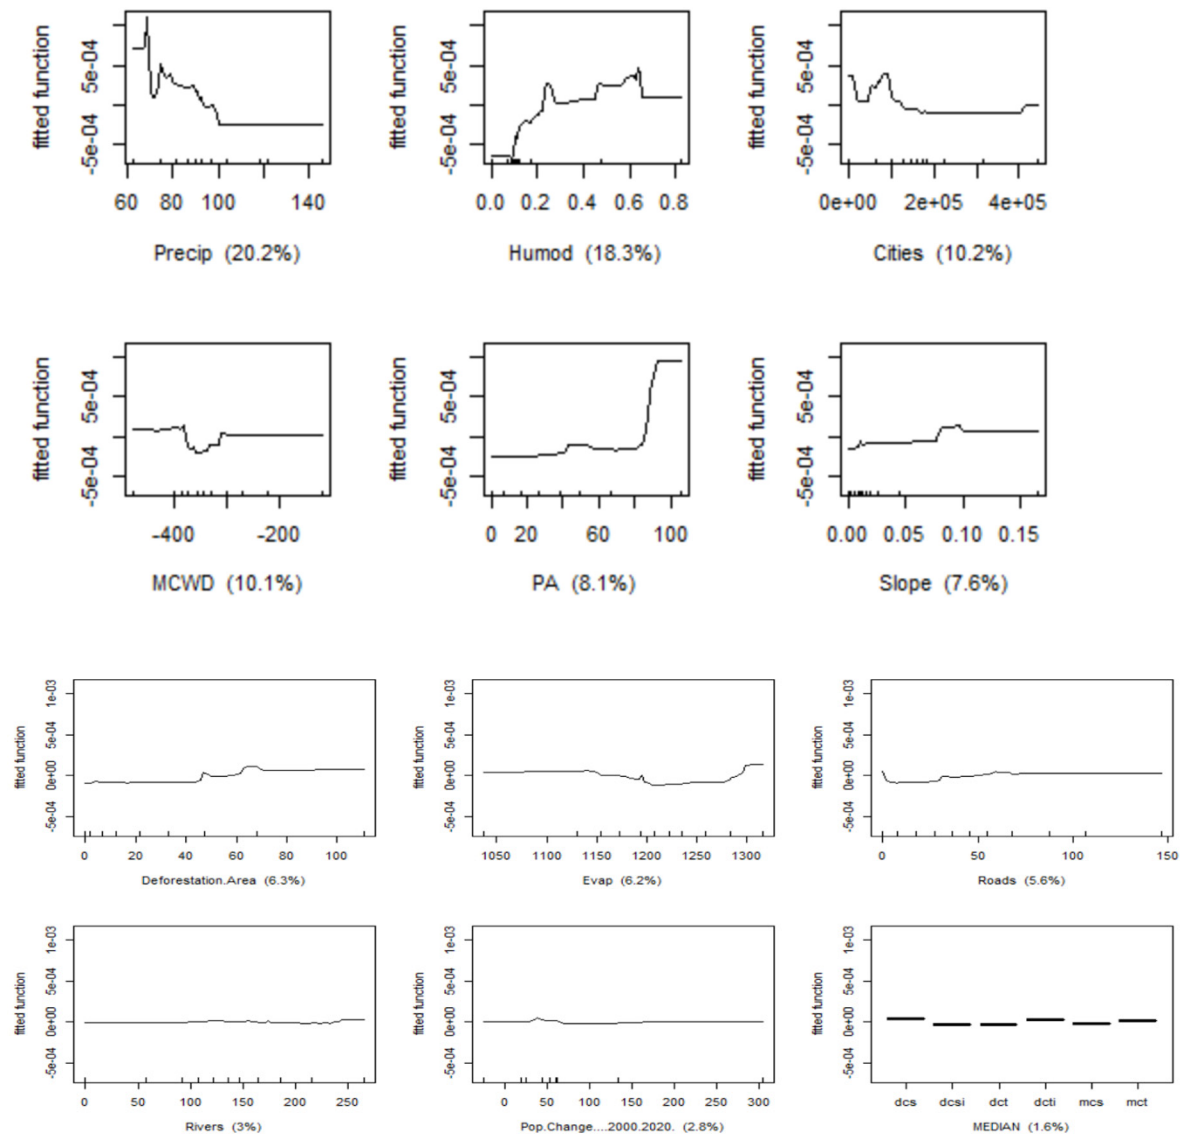

Figure S5: fitted functions for active fire density for the Chiquitano SDTF

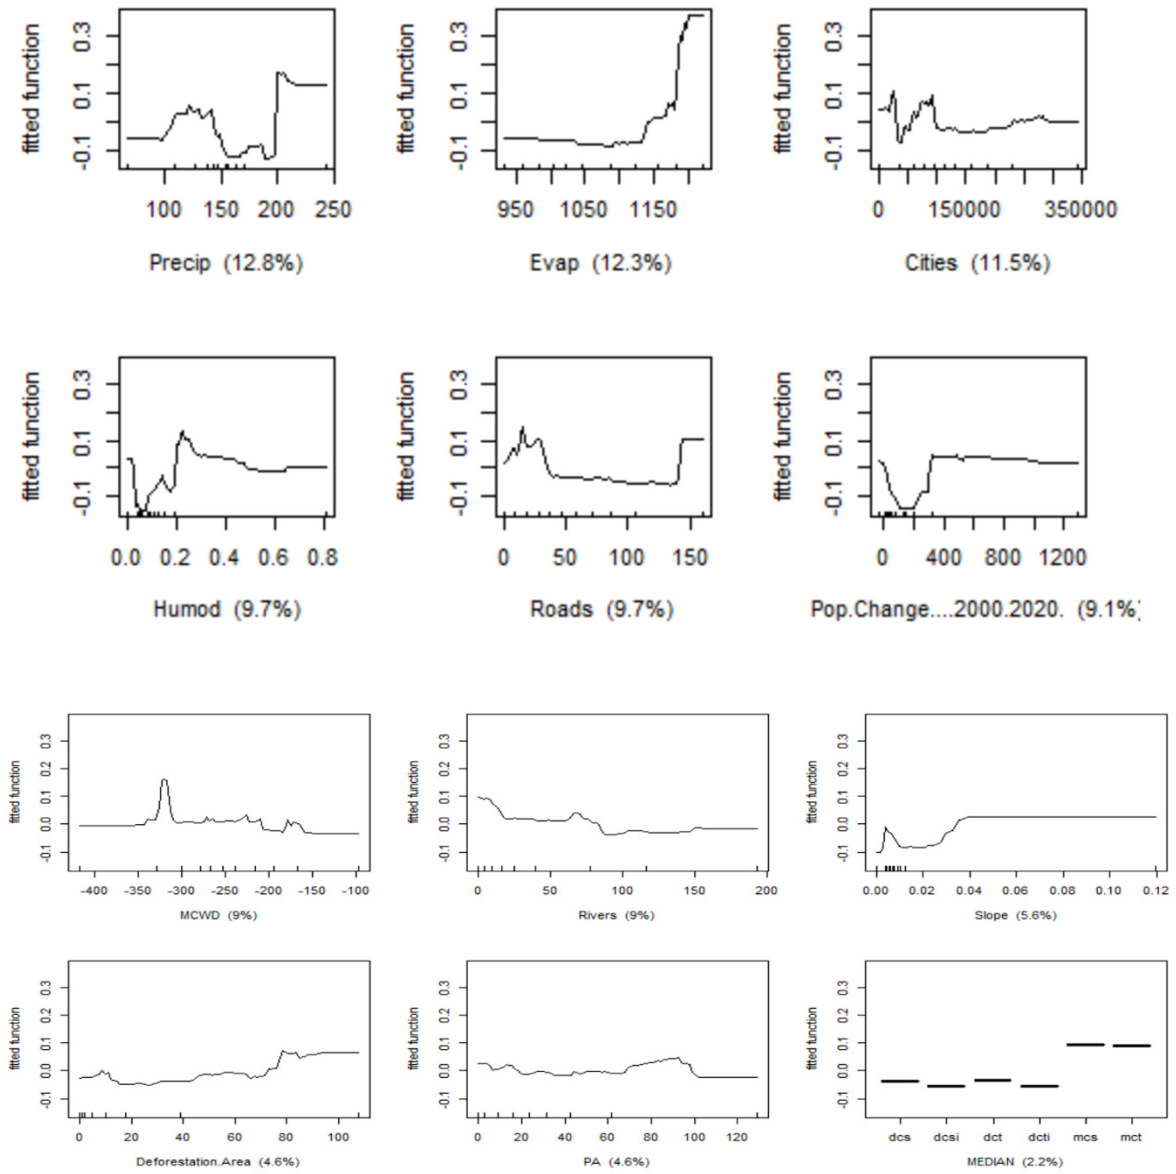

Figure S6: fitted functions for fire season length for the Chiquitano SDTF
